# Supplementary material
Source: publisher figshare collection journal article supplement (https://asha.figshare.com/articles/dataset/_/21313725)
Supplement: Supplementary file 2 [file 1]

**Supplemental Material S3. Summary data.**

**Pre-saline**

| Pitch # | Avg Freq (Hz) | Avg % Freq. Range | Avg PTP (cm H2O) |
|---------|---------------|-------------------|------------------|
| 1       | 213.6         | 9.1               | 2.20             |
| 2       | 297.6         | 18.2              | 2.77             |
| 3       | 443.7         | 34.2              | 3.03             |
| 4       | 582.1         | 49.3              | 3.64             |

|               |    |        |
|---------------|----|--------|
| Lowest pitch  | C3 | 130.8  |
| highest pitch | C6 | 1046.0 |

**Post-saline**

| Pitch # | Avg Freq (Hz) | Avg % Freq. Range | Avg PTP (cm H2O) |
|---------|---------------|-------------------|------------------|
| 1       | 200.5         | 6.7               | 1.41             |
| 2       | 407.5         | 26.5              | 1.36             |
| 3       | 558.2         | 40.9              | 2.15             |
| 4       | 799.6         | 64.1              | 2.51             |

|               |    |        |
|---------------|----|--------|
| Lowest pitch  | C3 | 130.8  |
| highest pitch | D6 | 1175.0 |
