# Supplementary material
Source: publisher figshare collection journal article supplement (https://asha.figshare.com/articles/dataset/_/21313725)
Supplement: Supplementary file 3 [file 1]

**Supplemental Material S1. Pre-saline data.**

| MID #    | Target<br>Pitch | Train # | Peak# | PTP   | PTP-sigma | T0       | T1       | #cycles | Frequency |
|----------|-----------------|---------|-------|-------|-----------|----------|----------|---------|-----------|
| 14.0576  | G3              | 1       | 3     | 2.408 | 0.189     | 245.4561 | 245.4059 | 10      | 199.00    |
|          |                 |         | 4     | 2.162 |           | 244.5943 | 244.5474 | 10      | 213.31    |
|          |                 |         | 4     | 2.037 |           | 236.8449 | 236.8012 | 10      | 228.57    |
| 108.9374 | C4              | 4       | 3     | 2.887 | 0.160     | 150.5391 | 150.5046 | 10      | 289.86    |
|          |                 |         | 4     | 2.854 |           | 149.6895 | 149.6561 | 10      | 299.58    |
|          |                 |         | 5     | 2.594 |           | 148.8553 | 148.8214 | 10      | 295.16    |
| 117.431  |                 | 5       | 3     | 2.528 |           | 141.9922 | 141.9587 | 10      | 298.51    |
|          |                 |         | 4     | 2.935 | 141.2609  | 141.2279 | 10       | 303.03  |           |
|          |                 |         | 5     | 2.844 | 140.4005  | 140.3671 | 10       | 299.67  |           |
| 113.5627 | G4              | 2       | 4     | 3.029 |           | 113.4536 | 113.4317 | 10      | 457.04    |
|          |                 |         | 5     | 2.881 | 112.6244  | 112.6015 | 10       | 437.06  |           |
|          |                 |         | 6     | 2.878 | 111.7569  | 111.7344 | 10       | 444.44  |           |
|          |                 | 4       | 3     | 3.230 | 98.42369  | 98.40094 | 10       | 439.54  |           |
|          |                 |         | 4     | 3.087 | 97.61058  | 97.58845 | 10       | 451.98  |           |
|          |                 |         | 5     | 3.054 | 96.80474  | 96.78161 | 10       | 432.43  |           |
| 57.29136 | C5              | 4       | 4     | 3.312 |           | 57.14143 | 57.12601 | 10      | 648.63    |
|          |                 |         | 5     | 3.195 | 49.9282   | 49.91095 | 10       | 579.71  |           |
|          |                 | 5       | 4     | 3.965 | 49.18474  | 49.1668  | 10       | 557.48  |           |
|          |                 |         | 5     | 4.105 | 48.40973  | 48.39129 | 10       | 542.39  |           |
