# Supplementary material
Source: publisher figshare collection journal article supplement (https://asha.figshare.com/articles/dataset/_/21313725)
Supplement: Supplementary file 4 [file 1]

**Supplemental Material S2. Post-saline data.**

| MID #    | Target Pitch | Train # | Peak# | PTP   | PTP-sigma | T0       | T1       | #cycles | Frequency |
|----------|--------------|---------|-------|-------|-----------|----------|----------|---------|-----------|
| 112.0364 | D3           | 9       | 2     | 1.118 |           | 112.3081 | 112.256  | 10      | 191.89    |
| 112.8483 |              |         | 3     | 1.089 |           | 113.079  | 113.0276 | 10      | 194.69    |
| 114.4214 |              |         | 5     | 1.257 |           | 114.672  | 114.6233 | 10      | 205.18    |
| 135.1024 |              | 10      | 2     | 1.338 |           | 135.3457 | 135.2955 | 10      | 199.05    |
| 135.8878 |              |         | 3     | 1.672 |           | 136.1356 | 136.0831 | 10      | 190.52    |
| 138.3343 |              |         | 6     | 1.664 |           | 138.5694 | 138.5195 | 10      | 200.55    |
| 182.964  |              | 17      | 3     | 1.586 |           | 183.2809 | 183.2344 | 10      | 215.11    |
| 183.7073 |              |         | 4     | 1.438 |           | 184.0001 | 183.9521 | 10      | 208.39    |
| 185.1499 |              |         | 6     | 1.547 |           | 185.3921 | 185.3419 | 10      | 199.05    |
| 203.5355 | C4           | 18      | 5     | 2.075 |           | 203.937  | 203.9015 | 10      | 281.79    |
| 204.3159 |              |         | 6     | 2.037 |           | 204.4822 | 204.4469 | 10      | 283.79    |
| 248.4569 |              |         | 2     | 0.706 |           | 248.6522 | 248.6182 | 10      | 294.23    |
| 251.4423 |              | 22      | 6     | 0.637 |           | 251.6536 | 251.6191 | 10      | 289.96    |
| 303.9846 | G4/G#4       |         | 4     | 1.461 |           | 304.1557 | 304.1306 | 10      | 398.22    |
| 304.7912 |              |         | 5     | 1.370 |           | 305.0139 | 304.9893 | 10      | 407.33    |
| 310.3007 |              | 28      | 2     | 1.252 |           | 310.4754 | 310.4514 | 10      | 416.89    |
| 32.32275 | C5           | 3b      | 2     | 0.804 |           | 32.47511 | 32.45713 | 10      | 555.93    |
| 33.09938 |              |         | 3     | 0.780 |           | 33.22474 | 33.20688 | 10      | 559.82    |
| 35.27513 |              |         | 6     | 0.804 |           | 35.42168 | 35.40394 | 10      | 563.79    |
| 42.76656 |              | 4b      | 5     | 2.412 |           | 42.90875 | 42.89116 | 10      | 568.60    |
| 51.61866 |              | 5b      | 2     | 2.341 |           | 51.8294  | 51.81204 | 10      | 575.97    |
| 52.40398 |              |         | 3     | 2.313 |           | 52.536   | 52.51903 | 10      | 589.10    |
| 53.87915 |              |         | 5     | 1.837 |           | 54.01646 | 53.99971 | 10      | 597.01    |
| 172.1367 |              | 18b     | 3     | 2.119 |           | 172.3022 | 172.2839 | 10      | 545.70    |
| 172.8995 |              |         | 4     | 2.466 |           | 172.9885 | 172.9701 | 10      | 545.70    |
| 173.6172 |              |         | 5     | 2.001 |           | 173.7147 | 173.6962 | 10      | 542.39    |
| 182.4483 |              | 19b     | 2     | 1.510 |           | 182.6781 | 182.6598 | 10      | 545.70    |
| 183.2281 |              |         | 3     | 2.477 |           | 183.3401 | 183.3215 | 10      | 535.82    |
| 185.2728 |              |         | 6     | 1.978 |           | 185.3885 | 185.3699 | 10      | 535.82    |
| 131.2183 | G5           | 14b     | 2     | 2.682 |           | 131.2852 | 131.2721 | 10      | 764.06    |
| 133.1676 |              |         | 5     | 2.797 |           | 133.2348 | 133.222  | 10      | 782.04    |
| 196.3236 |              |         | 2     | 2.410 |           | 196.4128 | 196.4007 | 10      | 823.93    |
| 197.0199 |              | 20b     | 3     | 2.567 |           | 197.1141 | 197.102  | 10      | 827.34    |
| 197.6816 |              |         | 4     | 2.098 |           | 197.7939 | 197.7814 | 10      | 800.83    |
| 203.9301 |              |         | 3     | 0.824 |           | 204.0394 | 204.0271 | 10      | 813.87    |
| 204.6054 |              | 21b     | 4     | 0.929 |           | 204.7217 | 204.7092 | 10      | 800.83    |
| 205.9142 |              |         | 6     | 0.854 |           | 206.2422 | 206.2302 | 10      | 834.24    |
