# Supplementary material
Source: publisher figshare collection journal article supplement (https://asha.figshare.com/articles/dataset/_/21313725)

**Supplemental Material S4.** PTP versus  $f_o$  data.

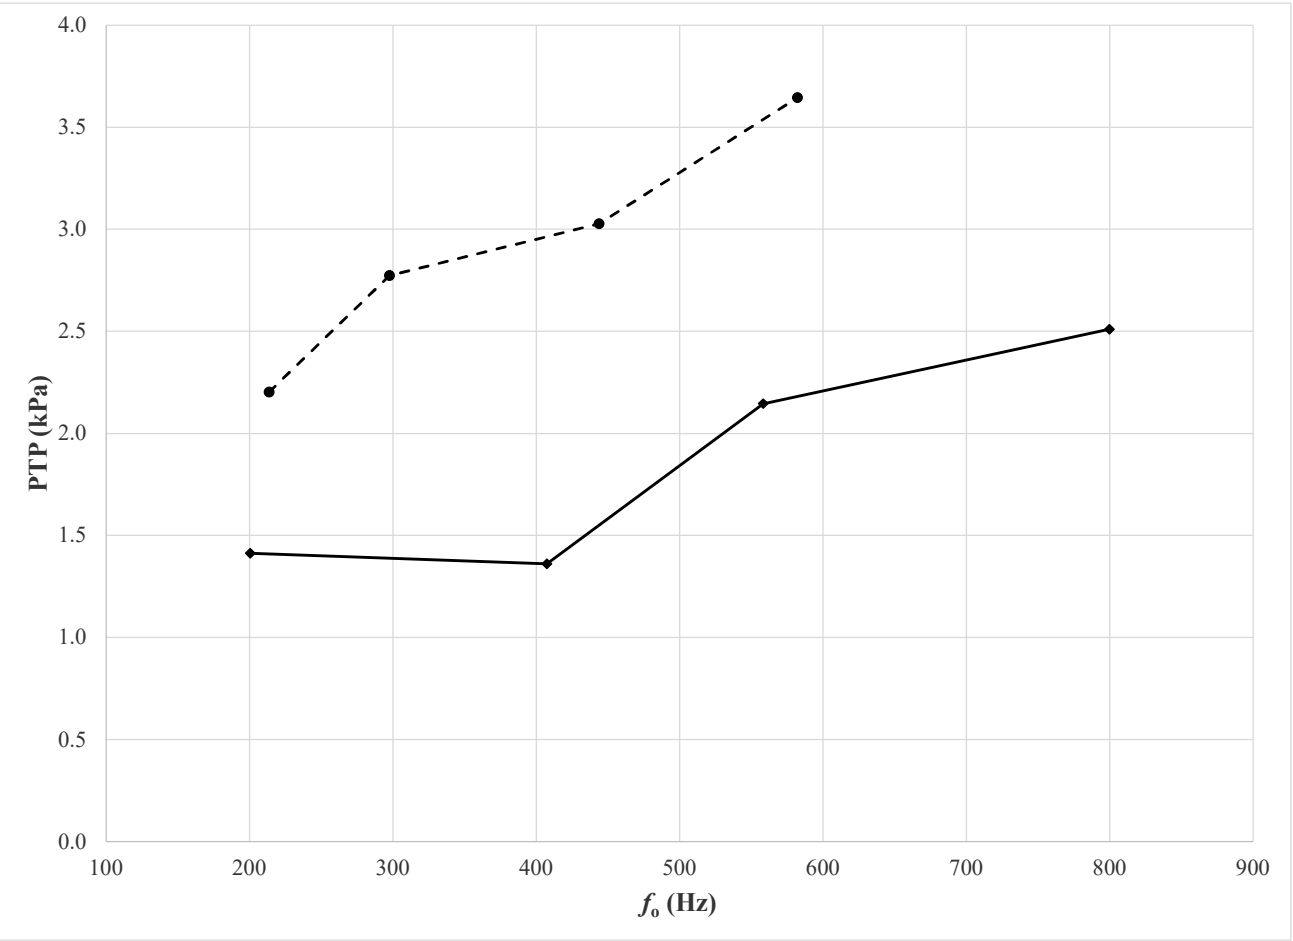

Supplement: Supplementary file 1 [file 1]
